# Supplementary material for: Down-Regulation of hsa-miR-10a in Chronic Myeloid Leukemia CD34+ Cells Increases USF2-Mediated Cell Growth
Source: Oxford University Press journal article supplement (doi:10.1158/1541-7786.mcr-08-0167), 2008-12-01
Supplement: 15417786mcr080167-sup-supplementary_table_s1.xls [file 15417786mcr080167-sup-supplementary_table_s1.xls]

## Sheet: Hoja1
Supplemental Table 1. Statistical analysis using SPSS package of differentially expressed miRNAs between MNCs of BM of CML patients and healthy donor samples. #: median (Q3;Q1). *: U Mann-Whitney
	Healthy Donors		CML
miRNA	ΔcT Average	SD	ΔcT Average	SD	p VALUE
hsa-miR-10a	4.33	0.805324	5.99	1.59842	0,041*
	4,44 (5,01; 3,50)#		5,21 (7,94; 4,74)#
hsa-miR-19a	-4.48833	1.01433	-5.43833	0.360855	0.056
hsa-miR-20	-4.04167	0.653036	-6.125	2.51763	0,026*
	-4,60 (-3,40; -4,61)#		-5,30 (-4,55; -7,31)#
hsa-miR-21	-6.2	0.886047	-4.25	1.5836	0.025
hsa-miR-29a	-6.29833	0.448706	-4.37167	0.957652	0.001
hsa-miR-29b	-4.57167	0.572518	-5.56333	4.54382	0,394*
	-4,64 (-3,96; -4,96)#		-3,14 (-2,37; -10,56)#
hsa-miR-29c	-5.94167	0.412137	-5.46	0.86946	0.248
hsa-miR-31	0.178333	0.699297	7.30667	1.51364	1e-06
hsa-miR-95	5.00167	3.83807	9.99833	2.44335	0,041*
	3,72 (6,20; 2,96)#		9,61 (12,55; 8,44)#
hsa-miR-96	9.15833	2.23247	6.27167	1.01659	0.016
hsa-miR-98	0.54	2.09838	-0.866667	0.826745	0,132*
	-0,14 (1,14; -0,39)#		-0,53 (-0,22; -1,84)#
hsa-miR-125a	-1.68167	0.92946	-0.0566667	1.32651	0.034
hsa-miR-126	0.958333	3.5275	-0.61	0.956096	0,485*
	-0,28 (2,56; -1,06)#		-0,68 (0,37; -1,28)#
hsa-miR-127	5.66833	1.37293	7.05167	1.36117	0.11
hsa-miR-133a	4.97667	1.60895	6.50833	1.31416	0.101
hsa-miR-133b	4.11833	1.53484	5.80333	1.04134	0.05
hsa-miR-135a	10.08	1.93331	8.39	2.68497	0,18*
	9,81 (11,99; 8,34)#		7,46 (10,00; 6,57)#
hsa-miR-135b	6.16333	1.11265	11.0967	2.34438	0,004*
	6,20 (7,33; 5,08)#		12,20 (12,89; 8,61)#
hsa-miR-138	2.47	12.1322	7.79667	1.71483	0,394*
	6,94 (8,19; -0,82)#		7,79 (9,19; 6,52)#
hsa-miR-144	10.4333	2.51179	8.36333	1.66578	0.123
hsa-miR-145	-2.02667	2.31768	-4.75333	0.891306	0.023
hsa-miR-146	-4.67667	0.528192	-1.97333	1.70475	0,004*
	-4,79 (-4,09; -5,13)#		-1,93 (-0,48; -3,69)#
hsa-miR-149	5.305	0.681344	6.89667	1.60313	0.049
hsa-miR-150	-8.23833	0.474148	-3.27167	0.927392	0,002*
	-8,31 (-7,80; -8,64)#		-2,81 (-2,59; -4,43)#
hsa-miR-151	1.035	0.72016	4.085	1.74444	0.003
hsa-miR-152	0.986667	0.456669	3.31333	2.13358	0,009*
	0,84 (1,50; 0,68)#		3,12 (4,30; 1,58)#
hsa-miR-154	8.93	3.08339	11.4483	2.82918	0.171
hsa-miR-154*	9.04167	3.29102	10.7533	2.86606	0.359
hsa-miR-187	6.40167	1.40276	9.11	2.43684	0.04
hsa-miR-189	7.11833	5.85085	9.47333	1.83258	0,485*
	8,32 (11,17; 4,19)#		8,51 (11,38; 8,21)#
hsa-miR-190	9.41	2.02648	7.71167	1.33748	0.117
hsa-miR-193	2.48667	1.12149	1.07	0.965878	0.041
hsa-miR-199a	2.70833	1.3966	4.13167	1.15858	0.084
hsa-miR-199a*	-2.815	1.07938	-4.24333	0.859085	0.03
hsa-miR-199b	-0.251667	1.75161	-2.21	0.98997	0.038
hsa-miR-199-s	1.22333	1.20139	2.54833	0.871147	0.054
hsa-miR-211	7.91167	1.85526	10.305	1.81424	0.047
hsa-miR-218	7.98333	3.26453	5.72	2.31356	0.196
hsa-miR-219	11.2367	2.04916	8.27167	1.77167	0.023
hsa-miR-221	-2.88167	0.519285	-3.845	0.953494	0.055
hsa-miR-222	-2.00667	0.534515	-2.88333	1.01236	0.09
hsa-miR-223	-9.745	1.79186	-11.5033	1.02432	0,065*
	-9,58 (-8,18; -11,23)#		-11,37 (-10,78; -12,42)#
hsa-miR-224	7.36833	2.71886	10.375	3.15618	0.108
hsa-miR-299	8.62833	2.3124	10.9217	2.36843	0.121
hsa-miR-301	-0.251667	0.585745	-1.28167	0.64459	0.016
hsa-miR-302c*	9.3	1.20829	11.7033	2.16664	0.039
hsa-miR-302d	11.125	1.89294	12.3617	0.783873	0,31*
	11,92 (12,43; 9,71)#		12,28 (13,07; 11,67)#
hsa-miR-323	9.165	1.91511	12.1	2.26089	0.036
hsa-miR-324-5p	0.528333	0.823879	-0.92	0.856808	0.014
hsa-miR-328	0.07	1.52506	-0.938333	0.907864	0.194
hsa-miR-342	-5.46667	0.353817	-2.92667	0.986482	0,002*
	-5,51 (-5,23; -5,74)#		-2,65 (-2,07; -4,09)#
hsa-miR-370	6.65167	1.26449	8.72167	1.88735	0.05
hsa-let-7b	-4.635	0.380723	-5.83167	0.81234	0.008
hsa-let-7i	-2.33167	0.697235	-3.685	0.916357	0.016
hsa-miR-16	-4.935	8.93512	-7.89167	1.95569	0,31*
	-7,45 (-0,37; -9,54)#		-8,28 (-6,77; -9,31)#
