# Supplementary material for: Down-Regulation of hsa-miR-10a in Chronic Myeloid Leukemia CD34+ Cells Increases USF2-Mediated Cell Growth
Source: Oxford University Press journal article supplement (doi:10.1158/1541-7786.mcr-08-0167), 2008-12-01
Supplement: 15417786mcr080167-sup-supplementary_table_s3.xls [file 15417786mcr080167-sup-supplementary_table_s3.xls]

## Sheet: Hoja1
Supplemental Table 3. Putative gene targets of hsa-miR-10a. mirBase (mB), miRanda (mR), TargetScan (T), and PicTar (P).
miRNA	Gene Symbol	Gene Name Description	Prediction algorithm
hsa-miR-10a	FXR2	fragile X mental retardation, autosomal homolog 2	mB+P+T+mR
hsa-miR-10a	ELAVL2	ELAV (embryonic lethal, abnormal vision, Drosophila)-like 2 (Hu antigen B)	mB+P+T+mR
hsa-miR-10a	FHL3	four and a half LIM domains 3	mB+P+T+mR
hsa-miR-10a	USF2	upstream transcription factor 2, c-fos interacting	mB+P+T+mR
hsa-miR-10a	IL1RAPL1	interleukin 1 receptor accessory protein-like 1	mB+P+T+mR
hsa-miR-10a	HNRPK	heterogeneous nuclear ribonucleoprotein K	mB+P+T+mR
hsa-miR-10a	GTF2H1	general transcription factor IIH, polypeptide 1, 62kDa	mB+P+T+mR
hsa-miR-10a	BCL6	B-cell CLL/lymphoma 6 (zinc finger protein 51)	mB+P+T+mR
hsa-miR-10a	ID4	inhibitor of DNA binding 4, dominant negative helix-loop-helix protein	mB+P+T+mR
hsa-miR-10a	SFRS1	splicing factor, arginine/serine-rich 1 (splicing factor 2, alternate splicing factor)	mB+P+T+mR
hsa-miR-10a	TMOD1	tropomodulin	mB+P+T+mR
hsa-miR-10a	EPHA8	EPH receptor A8	mB+P+T+mR
hsa-miR-10a	GRM3	glutamate receptor, metabotropic 3	mB+P+T
hsa-miR-10a	ACTG1	actin, gamma 1	mB+P+T
hsa-miR-10a	DOCK11	dedicator of cytokinesis 11	mB+P+T
hsa-miR-10a	DAZAP1	DAZ associated protein 1	mB+P+T
hsa-miR-10a	NCOA6	nuclear receptor coactivator 6	mB+P+T
hsa-miR-10a	ZMYND11	zinc finger, MYND domain containing 11	mB+P+T
hsa-miR-10a	RAP2A	RAP2A, member of RAS oncogene family	mB+P+T
hsa-miR-10a	TFAP2C	transcription factor AP-2 gamma (activating enhancer binding protein 2 gamma)	mB+P+T
hsa-miR-10a	NCOR2	nuclear receptor co-repressor 2	mB+P+T
hsa-miR-10a	BTBD11	BTB (POZ) domain containing 11	mB+P+T
hsa-miR-10a	NR4A3	nuclear receptor subfamily 4, group A, member 3	P+T+mR
hsa-miR-10a	SLC25A1	solute carrier family 25 (mitochondrial carrier; citrate transporter), member 1	P+T+mR
hsa-miR-10a	HOXD10	homeo box D10	P+T+mR
hsa-miR-10a	MAPRE1	microtubule-associated protein, RP/EB family, member 1	P+T+mR
hsa-miR-10a	EBF2	early B-cell factor 2	P+T+mR
hsa-miR-10a	POMT2	putative protein O-mannosyltransferase	P+T+mR
hsa-miR-10a	LPHN1	lectomedin-2	P+T+mR
hsa-miR-10a	SON	SON DNA binding protein	P+T+mR
hsa-miR-10a	SFRS10	splicing factor, arginine/serine-rich 10 (transformer 2 homolog, Drosophila)	P+T+mR
hsa-miR-10a	RB1CC1	RB1-inducible coiled-coil 1	P+T+mR
hsa-miR-10a	BAZ2B	bromodomain adjacent to zinc finger domain, 2B	P+T+mR
hsa-miR-10a	BTBD14B	BTB (POZ) domain containing 14B	P+T+mR
hsa-miR-10a	CTDSPL	CTD (carboxy-terminal domain, RNA polymerase II, polypeptide A) small phosphatase-like	P+T+mR
hsa-miR-10a	MTMR3	myotubularin related protein 3	P+T+mR
hsa-miR-10a	ANKFY1	ankyrin repeat and FYVE domain containing 1	P+T+mR
hsa-miR-10a	HOXA3	homeo box A3	P+T+mR
hsa-miR-10a	GATA6	GATA binding protein 6	P+T+mR
hsa-miR-10a	KL	klotho	P+T+mR
hsa-miR-10a	GALNT1	UDP-N-acetyl-alpha-D-galactosamine:polypeptide N-acetylgalactosaminyltransferase 1 (GalNAc-T1)	P+T+mR
hsa-miR-10a	MAMDC1	MAM domain containing 1	P+T+mR
hsa-miR-10a	TBX5	T-box 5	P+T+mR
hsa-miR-10a	NRP2	neuropilin 2	P+T+mR
hsa-miR-10a	HIVEP2	human immunodeficiency virus type I enhancer binding protein 2	P+T+mR
hsa-miR-10a	BRUNOL6	bruno-like 6, RNA binding protein (Drosophila)	P+T+mR
hsa-miR-10a	SDC1	syndecan 1	P+T+mR
hsa-miR-10a	ARRDC3	arrestin domain containing 3	P+T+mR
hsa-miR-10a	IGSF4	immunoglobulin superfamily, member 4	P+T+mR
hsa-miR-10a	SLC38A2	solute carrier family 38, member 2	P+T+mR
hsa-miR-10a	ARNT	aryl hydrocarbon receptor nuclear translocator	P+T+mR
hsa-miR-10a	HAS3	hyaluronan synthase 3	P+T+mR
hsa-miR-10a	CAMK2G	calcium/calmodulin-dependent protein kinase (CaM kinase) II gamma	P+T+mR
hsa-miR-10a	BTRC	beta-transducin repeat containing	P+T+mR
hsa-miR-10a	APPBP2	amyloid beta precursor protein (cytoplasmic tail) binding protein 2	P+T+mR
hsa-miR-10a	PAFAH1B1	platelet-activating factor acetylhydrolase, isoform Ib, alpha subunit 45kDa	P+T+mR
hsa-miR-10a	BACH2	BTB and CNC homology 1, basic leucine zipper transcription factor 2	P+T+mR
hsa-miR-10a	E2F3	E2F transcription factor 3	P+T+mR
hsa-miR-10a	NFAT5	nuclear factor of activated T-cells 5, tonicity-responsive	P+T+mR
hsa-miR-10a	NFIX	nuclear factor I/X (CCAAT-binding transcription factor)	mB+T+mR
hsa-miR-10a	MAP3K7	mitogen-activated protein kinase kinase kinase 7	mB+T+mR
